# Supplementary material for: Characterization of Staphylococcus aureus EssB, an integral membrane component of the Type VII secretion system: atomic resolution crystal structure of the cytoplasmic segment
Source: PubMed Central journal article supplement — Biochem J. 2012 Dec 14;449(Pt 2):469–77. doi: 10.1042/BJ20121209 (PMC3526858; doi:10.1042/bj20121209), 2012-12-14
Supplement: bj4490469add.pdf [file bj4490469add.pdf]

## SUPPLEMENTARY ONLINE DATA

# Characterization of *Staphylococcus aureus* EssB, an integral membrane component of the Type VII secretion system: atomic resolution crystal structure of the cytoplasmic segment

Martin ZOLTNER, Paul K. FYFE, Tracy PALMER and William N. HUNTER<sup>1</sup>

College of Life Sciences, University of Dundee, Dow Street, Dundee DD1 5EH, U.K.

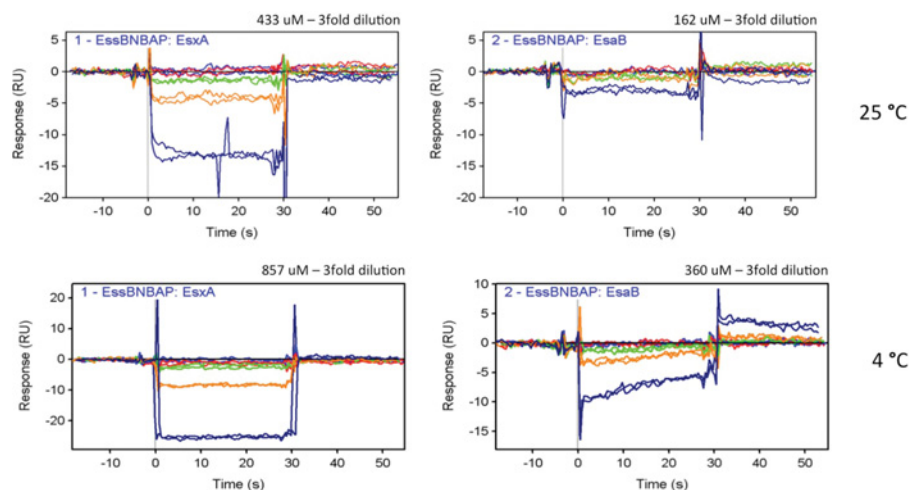

**Figure S1** SPR analysis of potential EssB-N interactions

BAP-tagged EssB-N was captured on a streptavidin chip (see the Experimental section of the main text). Binding of EsxA (left-hand panels) and EsaB (right-hand panels) was measured at 25 °C (upper panels) and 4 °C (lower panels). The curves correspond to a dilution series starting from the concentration indicated (dark blue curve). Shown are the binding curves after subtracting binding to the empty reference chip. The negative response signals obtained suggest non-specific binding (see the Results and discussion section of the main text).

<sup>1</sup> To whom correspondence should be addressed (email w.n.hunter@dundee.ac.uk).

The atomic co-ordinates and structure factors have been deposited in the PDB under code 4ANN.

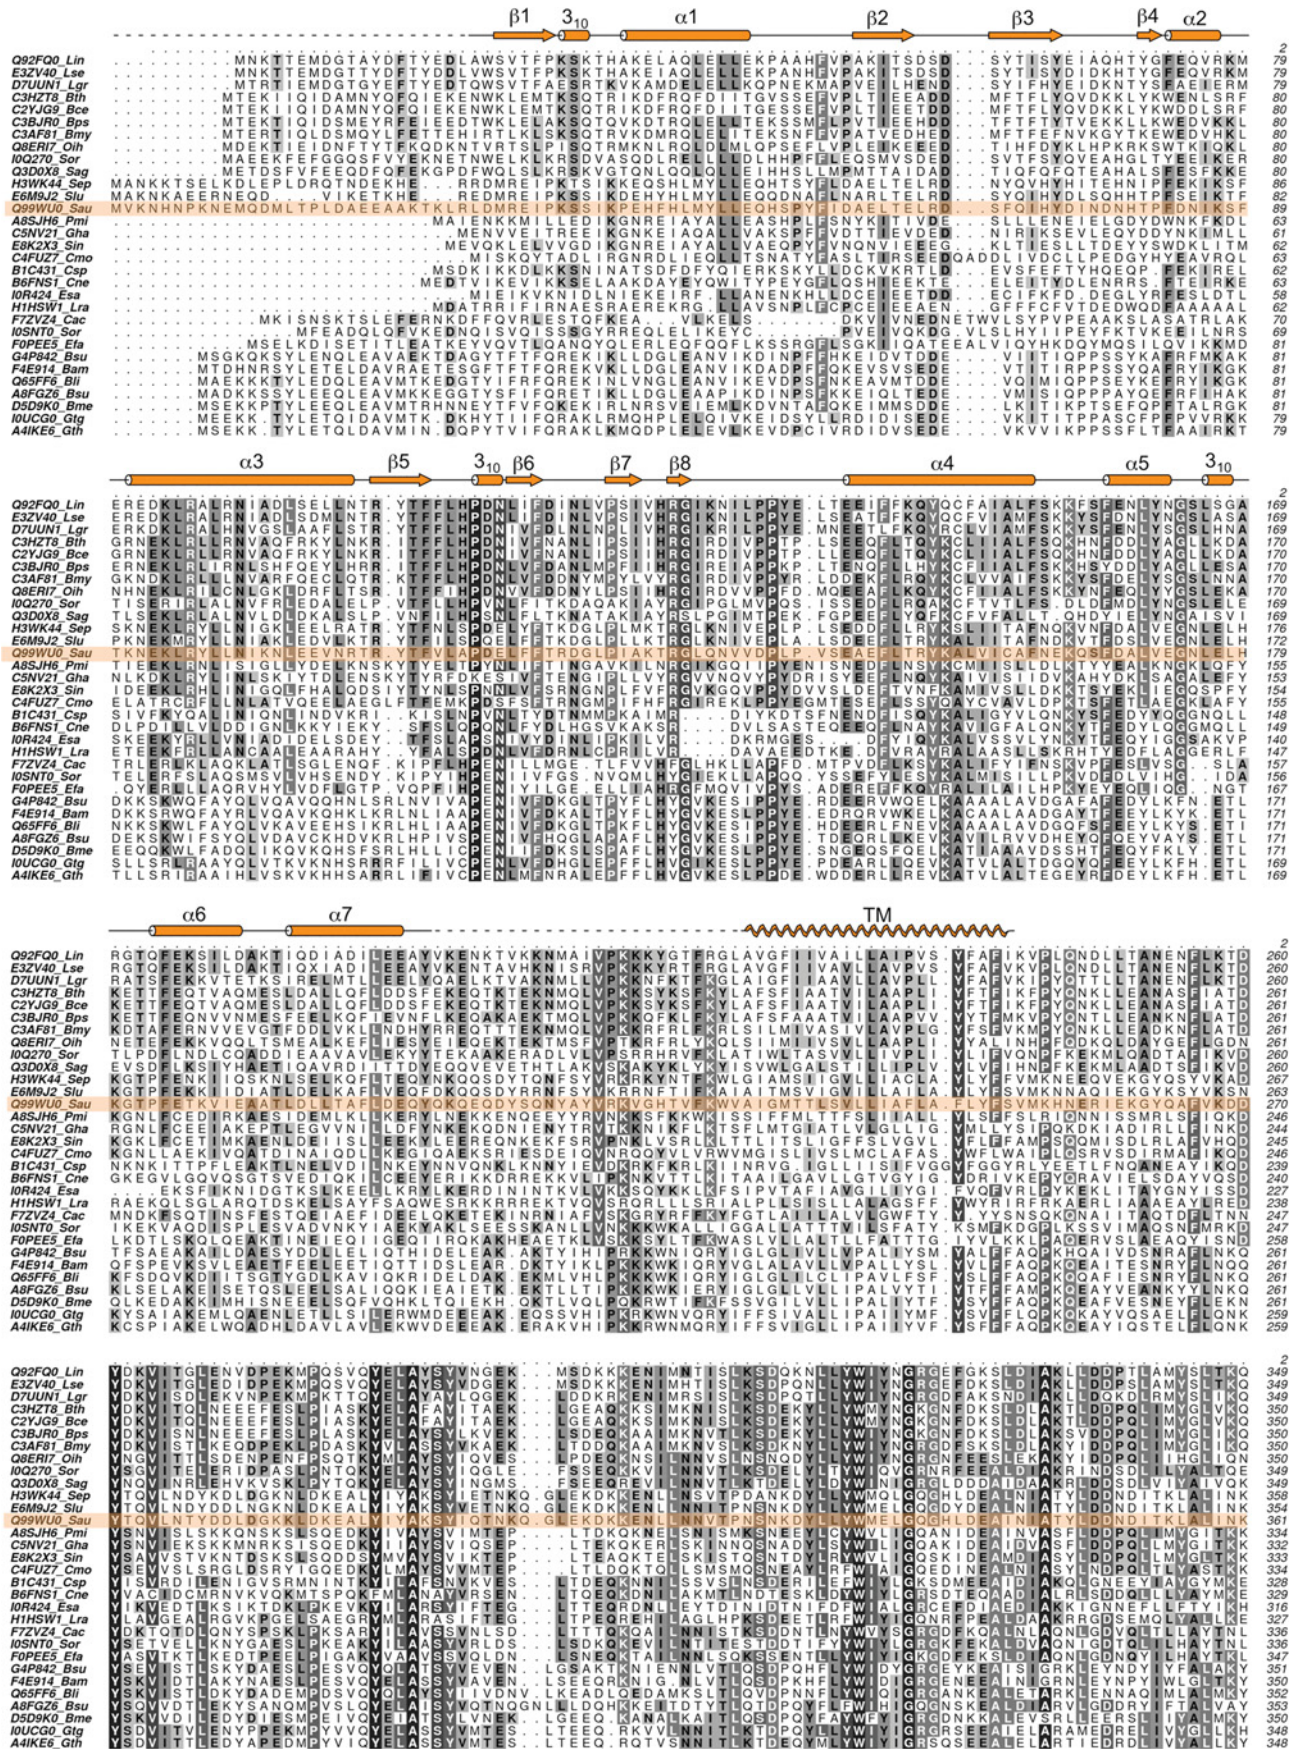

Figure S2 Multiple sequence alignment of ESB-N orthologues

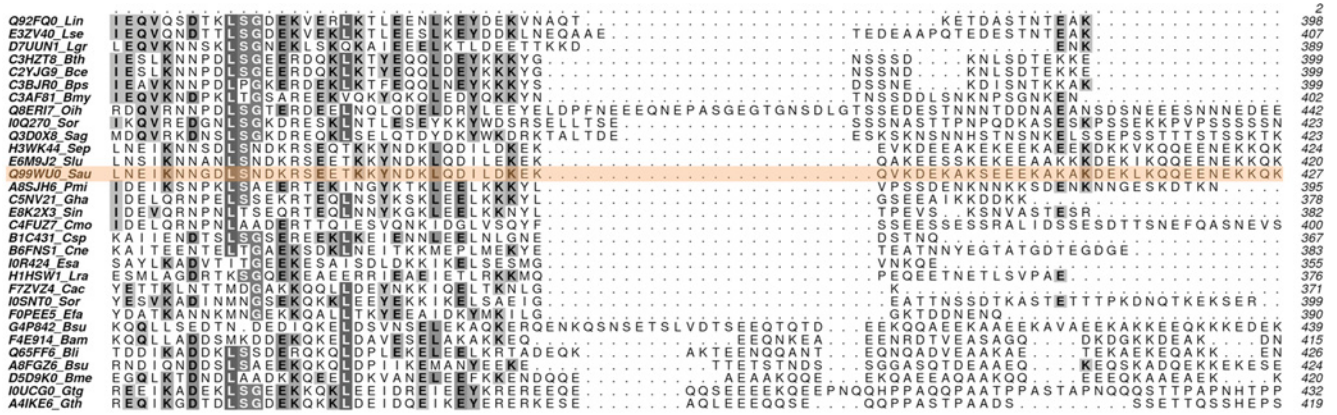

|                   |     |
|-------------------|-----|
| <i>Q92FQ0_Lin</i> | 398 |
| <i>E32V40_Lse</i> | 407 |
| <i>D7UUNT_Lgr</i> | 389 |
| <i>C3HZT8_Bth</i> | 399 |
| <i>C2YJG9_Bce</i> | 399 |
| <i>C3BJR0_Bps</i> | 399 |
| <i>C3JAF1_Bmy</i> | 402 |
| <i>Q8ER17_Oih</i> | 442 |
| <i>I0Q270_Sor</i> | 423 |
| <i>Q3D0X8_Sag</i> | 425 |
| <i>H3WK44_Sep</i> | 441 |
| <i>E6M9J2_Slu</i> | 437 |
| <i>Q89WU0_Sau</i> | 444 |
| <i>A8SJH6_Pmi</i> | 395 |
| <i>C5NV21_Gha</i> | 378 |
| <i>E8K2X3_Sin</i> | 382 |
| <i>C4FUZ7_Cmo</i> | 414 |
| <i>B1C431_Csp</i> | 367 |
| <i>B6FNS1_Cne</i> | 383 |
| <i>I0R424_Esa</i> | 355 |
| <i>H1HSW1_Lra</i> | 376 |
| <i>F7ZV24_Cac</i> | 371 |
| <i>ISONT0_Sor</i> | 399 |
| <i>F0PEE5_Eta</i> | 390 |
| <i>G4P842_Bsu</i> | 452 |
| <i>F4E914_Bam</i> | 429 |
| <i>G65FF6_Bli</i> | 438 |
| <i>A8FGZ6_Bsu</i> | 438 |
| <i>D5D9K0_Bme</i> | 434 |
| <i>IUUCG0_Gtg</i> | 446 |
| <i>A4IKE6_Gth</i> | 428 |

Figure S2 Multiple sequence alignment of EssB-N orthologues (cont.)

EssB-N secondary structure elements and the predicted transmembrane span (TM) are indicated. Selected EssB-N sequences are titled with a UniProt identifier and species abbreviation. Lin, *Listeria innocua*; Lse, *Listeria seeligeri*; Lgr, *Listeria grayi*; Bth, *Bacillus thuringiensis*; Bce, *Bacillus cereus*; Bps, *Bacillus pseudomycoloides*; Bmy, *Bacillus mycoloides*; Oih, *Oceanobacillus ihayensis*; Sor, *Streptococcus oralis*; Sag, *Streptococcus agalactiae*; Sep, *Staphylococcus epidermis*; Slu, *Staphylococcus lugdunensis*; Sau, *Staphylococcus aureus*; Pmi, *Parvimonas micra*; Gha, *Gemella haemolysans*; Sin, *Streptococcus infantis*; Cmo, *Catonella morbi*; Csp, *Clostridium spiroforme*; Cne, *Clostridium nexile*; Esa, *Eubacterium saburreum*; Lra, *Lachnospiraceae bacterium*; Cac, *Clostridium acetobutylicum*; Eta, *Enterococcus faecalis*; Bsu, *Bacillus subtilis*; Bam, *Bacillus amyloliquefaciens*; Bli, *Bacillus licheniformis*; Bme, *Bacillus megaterium*; Gtg, *Geobacillus thermoglucosidans*; and Gth, *Geobacillus thermodenitrificans*.

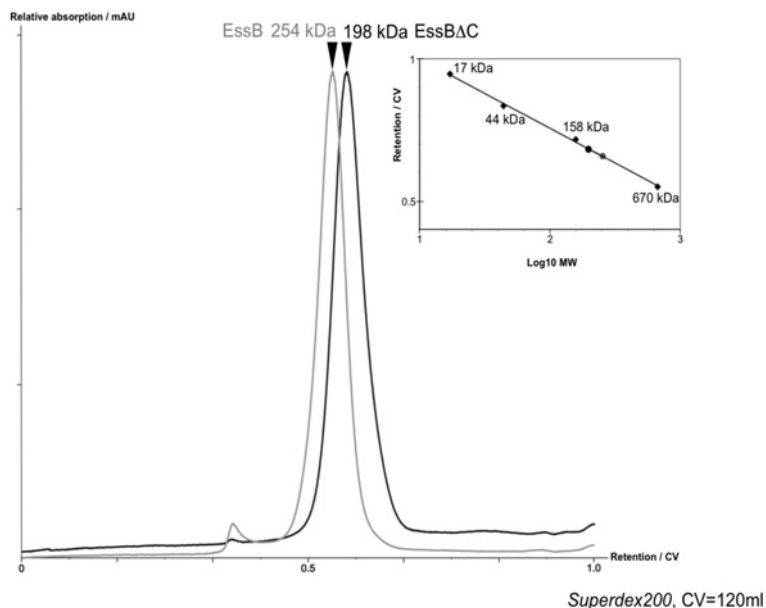

**Figure S3 Analytical gel filtration of detergent-solubilized EssB**

Overlay of size-exclusion chromatography chromatograms for EssB and truncated EssB $\Delta$ C. Protein (5 mg) was loaded on to a CV of 120 ml Superdex 200 (prep grade; GE Healthcare) column equilibrated with 10 mM sodium phosphate, 50 mM NaCl, 1 mM DTT, 1  $\mu$ g/ml DOPC and 0.02% DDM. Peaks are labelled with apparent molecular masses calculated from a previously determined calibration curve (inset; see the Experimental section of the main text).

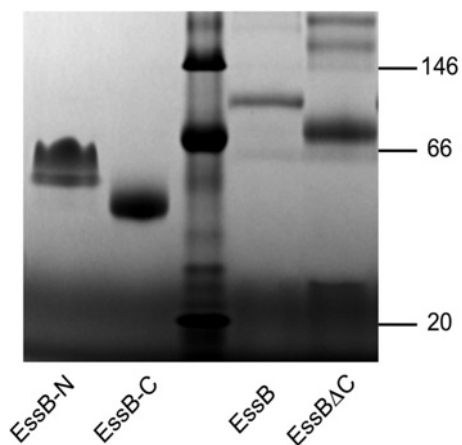

**Figure S4 BN-PAGE analysis of the EssB constructs**

BN-PAGE of purified EssB-N (far-left lane), EssB-C (near-left lane), EssB (near-right lane) and EssB $\Delta$ C (far-right lane). All constructs are migrating as dimers with apparent molecular masses of 58 kDa, 42 kDa, 98 kDa and 72 kDa, derived by comparison with the molecular mass standards (centre lane, masses given in kDa on the right-hand side; see the Experimental section of the main text). For EssB-N an additional band at 51 kDa is visible that corresponds to the degradation product (see the Results and discussion section of the main text).

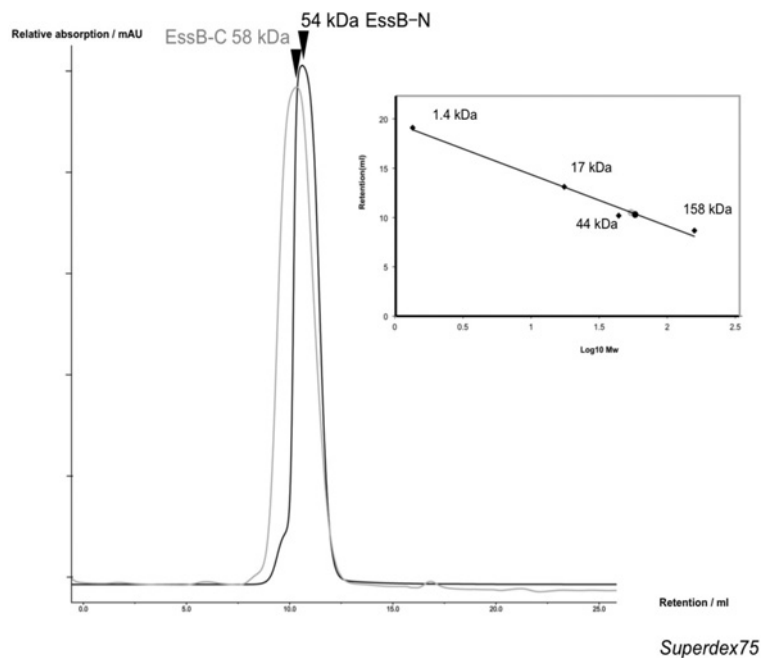

**Figure S5 Analytical gel filtration of EssB isolated soluble domains**

Overlay of size-exclusion chromatography chromatograms for EssB-N and EssB-C. Protein (8 mg) was loaded on a CV of 24 ml Superdex 75 (prep grade, GE Healthcare) column equilibrated with 10 mM sodium phosphate, 50 mM NaCl and 1 mM DTT. Peaks are labelled with apparent molecular masses calculated from the calibration curve (inset; see the Experimental section of the main text).

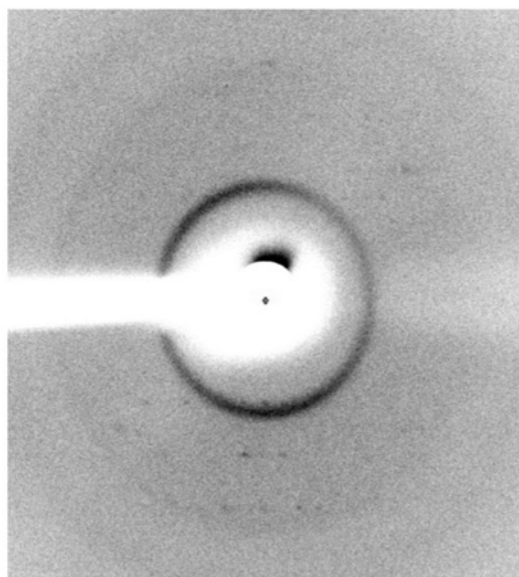

**Figure S6 Diffraction pattern from EssB-C crystals**

An example diffraction image of EssB-C crystals recorded using in-house facilities (see the Experimental section of the main text).

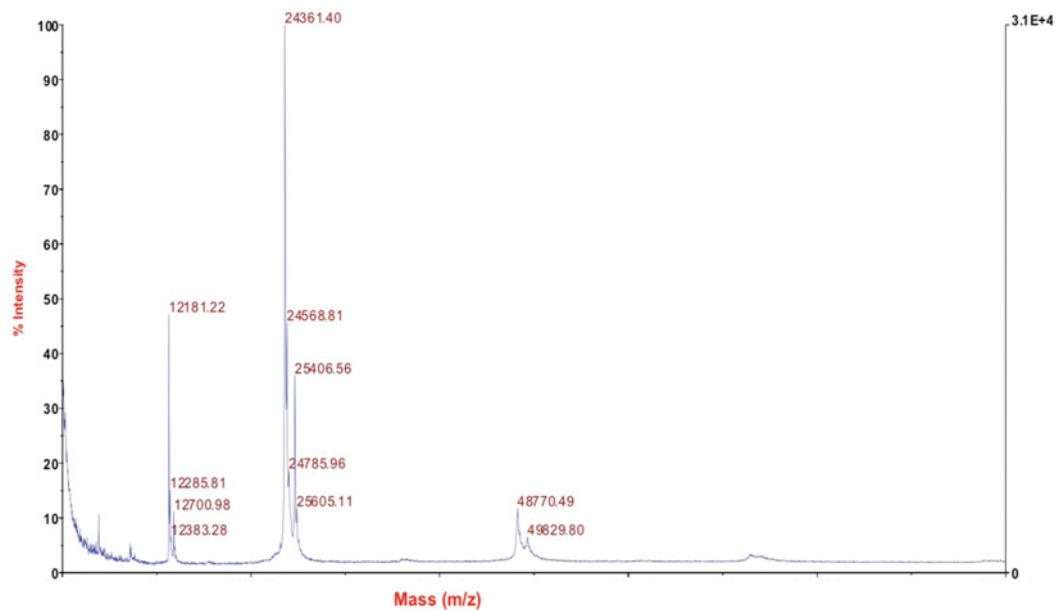

**Figure S7** ESI-Q-TOF-MS analysis of purified EssB-N

ESI-Q-TOF-MS analysis of the EssB-N sample prior to crystallization (see the Results and discussion section of the main text).

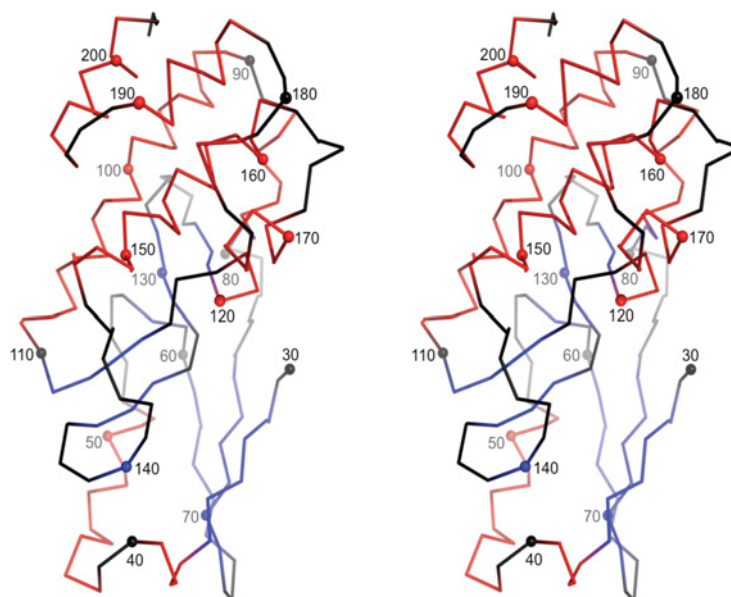

**Figure S8** EssB-N structure, stereo view of the C $\alpha$  trace

The chain is coloured by secondary structure elements (black, loop; red, helix; and blue, strand) and residue numbers are indicated at every tenth C $\alpha$  (shown as spheres).

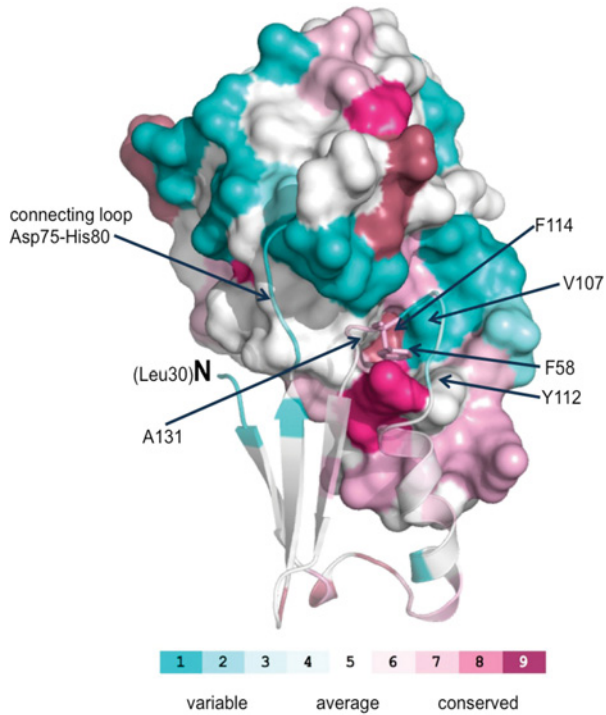

**Figure S9 Conservation mapping on to the EssB-N C-terminal domain surface**

The continuous conservation scores are normalized and partitioned into nine discrete conservation bins (darkest pink indicates the most conserved), reflecting the relative degree of conservation of each amino acid position (see the Experimental section of the main text).

**Table S1 Primers used to generate samples for the bacterial two-hybrid experiments**

Restriction sites are in bold.

| Construct  | Primers (forward/reverse)                                                                                     |
|------------|---------------------------------------------------------------------------------------------------------------|
| pT18EssB-N | 5'-GCGC <b>CTCGAG</b> GAAAAACCATAACCCGAAAAACGAAATG-3'<br>5'-GCGC <b>AAAGCTT</b> GCCACGGTATGGCCACTTTGCGCAC-3'  |
| pT25EsxA   | 5'-GCGC <b>GGATCC</b> CGCGATGATTAATAAGAGCCGGAAG-3'<br>5'-GCGC <b>GGTACC</b> TACTGCAGGCCAAAGTTGTTGCTCAGC-3'    |
| pT25EsxB   | 5'-GCGC <b>GGATCC</b> CGGCGGCTATAAAGGCATTAAGC-3'<br>5'-GCGC <b>GGTACC</b> TACGGGTTACGCGATCCAGGCCCTG-3'        |
| pT25EsxB   | 5'-GCGC <b>GGATCC</b> CAATCAGCACGTAAGTAAC-3'<br>5'-GCGC <b>GGTACC</b> TACAGCAGTTTCAGAATATCGCCATC-3'           |
| pT25EsaB   | 5'-GCGC <b>GGATCC</b> CAACTTTAACGATATTGAAACGATG-3'<br>5'-GCGC <b>GGTACC</b> TAGTTCATCGCTTTGTTAAATATTCGCTCG-3' |

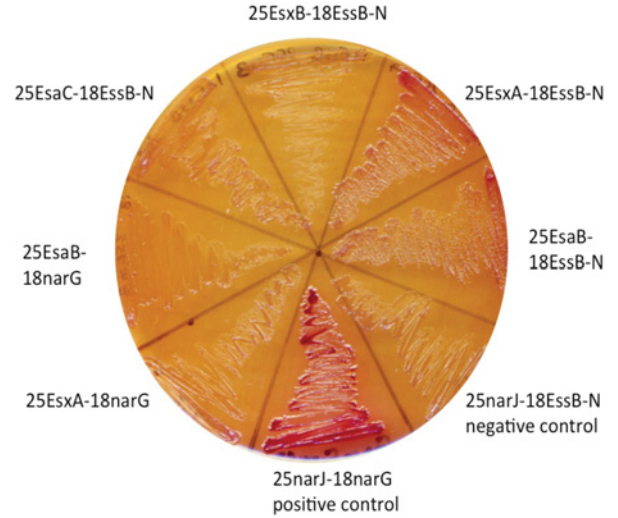

**Figure S10 Bacterial two-hybrid assay**

*E. coli* BTH101 cells were co-transformed with pT25 constructs encoding EsxA, EsxB, EsaB and EsaC fusions in combination with pT18EssB or either pT25narJ or pT18narG as a negative control. The combination pT25narJ/pT18narG, producing a stable dimer, served as a positive control. Initial colonies were re-streaked on to fresh MacConkey/maltose plates and incubated for 36 h at 25 °C.

**Table S2 Primers used to generate samples for the SPR experiments**

Restriction sites are in bold.

| Construct  | Primers (forward/reverse)                                                                                     |
|------------|---------------------------------------------------------------------------------------------------------------|
| pT18EssB-N | 5'-GCGC <b>CTCGAG</b> GAAAAACCATAACCCGAAAAACGAAATG-3'<br>5'-GCGC <b>AAAGCTT</b> GCCACGGTATGGCCACTTTGCGCAC-3'  |
| pT25EsxA   | 5'-GCGC <b>GGATCC</b> CGCGATGATTAATAAGAGCCGGAAG-3'<br>5'-GCGC <b>GGTACC</b> TACTGCAGGCCAAAGTTGTTGCTCAGC-3'    |
| pT25EsxB   | 5'-GCGC <b>GGATCC</b> CGGCGGCTATAAAGGCATTAAGC-3'<br>5'-GCGC <b>GGTACC</b> TACGGGTTACGCGATCCAGGCCCTG-3'        |
| pT25EsxB   | 5'-GCGC <b>GGATCC</b> CAATCAGCACGTAAGTAAC-3'<br>5'-GCGC <b>GGTACC</b> TACAGCAGTTTCAGAATATCGCCATC-3'           |
| pT25EsaB   | 5'-GCGC <b>GGATCC</b> CAACTTTAACGATATTGAAACGATG-3'<br>5'-GCGC <b>GGTACC</b> TAGTTCATCGCTTTGTTAAATATTCGCTCG-3' |

**Table S3** Tryptic fragments identified from analysis of EssB-N crystals

MALDI-TOF-MS analysis of EssB-N after tryptic digest (for details see the Experimental section of the main text). The N- and C-terminal peptides are highlighted in blue and red respectively.  $M_r(\text{calc})$ , calculated  $M_r$ ;  $M_r(\text{expt})$ , expected  $M_r$ .

| Query | Observed    | $M_r(\text{expt})$ | $M_r(\text{calc})$ | p.p.m. | Miss | Score | Expect  | Rank | Peptide                                                    |
|-------|-------------|--------------------|--------------------|--------|------|-------|---------|------|------------------------------------------------------------|
| 367   | 582.810440  | 1163.606328        | 1163.600861        | 4.70   | 0    | 75    | 3.4e-08 | 1    | K.ALVICAFNEK.Q                                             |
| 368   | 582.810440  | 1163.606328        | 1163.600861        | 4.70   | 0    | (56)  | 2.5e-06 | 1    | K.ALVICAFNEK.Q                                             |
| 369   | 582.810440  | 1163.606328        | 1163.600861        | 4.70   | 0    | (37)  | 0.00018 | 1    | K.ALVICAFNEK.Q                                             |
| 370   | 582.810440  | 1163.606328        | 1163.600861        | 4.70   | 0    | (44)  | 4.5e-05 | 1    | K.ALVICAFNEK.Q                                             |
| 373   | 583.309937  | 1164.605322        | 1163.600861        | 863    | 0    | (9)   | 0.12    | 1    | K.ALVICAFNEK.Q                                             |
| 415   | 614.743591  | 1227.472630        | 1227.468002        | 3.77   | 0    | 48    | 1.5e-05 | 1    | K.QEQDYSQNYA.- + Gln->pyro-Glu (N-term)                    |
| 416   | 614.743591  | 1227.472630        | 1227.468002        | 3.77   | 0    | (28)  | 0.0016  | 1    | K.QEQDYSQNYA.- + Gln->pyro-Glu (N-term)                    |
| 420   | 623.257599  | 1244.500646        | 1244.494537        | 4.91   | 0    | (26)  | 0.0027  | 1    | K.QEQDYSQNYA.-                                             |
| 421   | 623.257599  | 1244.500646        | 1244.494537        | 4.91   | 0    | (33)  | 0.00046 | 1    | K.QEQDYSQNYA.-                                             |
| 422   | 623.257599  | 1244.500646        | 1244.494537        | 4.91   | 0    | (21)  | 0.0086  | 1    | K.QEQDYSQNYA.-                                             |
| 423   | 623.257599  | 1244.500646        | 1244.494537        | 4.91   | 0    | (20)  | 0.0095  | 1    | K.QEQDYSQNYA.-                                             |
| 425   | 623.752838  | 1245.491124        | 1244.494537        | 801    | 0    | (10)  | 0.096   | 1    | K.QEQDYSQNYA.-                                             |
| 426   | 623.752838  | 1245.491124        | 1244.494537        | 801    | 0    | (12)  | 0.058   | 1    | K.QEQDYSQNYA.-                                             |
| 607   | 841.926209  | 1681.837866        | 1681.831146        | 4.00   | 0    | (51)  | 7.6e-06 | 1    | K.QSFDALVEGNLELHK.G + glycine-> pyroglutamate (N-terminus) |
| 608   | 841.926209  | 1681.837866        | 1681.831146        | 4.00   | 0    | (70)  | 1e-07   | 1    | K.QSFDALVEGNLELHK.G + glycine-> pyroglutamate (N-terminus) |
| 609   | 841.926209  | 1681.837866        | 1681.831146        | 4.00   | 0    | (28)  | 0.0016  | 1    | K.QSFDALVEGNLELHK.G + glycine-> pyroglutamate (N-terminus) |
| 615   | 850.441223  | 1698.867894        | 1698.857681        | 6.01   | 0    | 75    | 2.9e-08 | 1    | K.QSFDALVEGNLELHK.G                                        |
| 616   | 850.441223  | 1698.867894        | 1698.857681        | 6.01   | 0    | (22)  | 0.0057  | 1    | K.QSFDALVEGNLELHK.G                                        |
| 617   | 850.441223  | 1698.867894        | 1698.857681        | 6.01   | 0    | (47)  | 1.9e-05 | 1    | K.QSFDALVEGNLELHK.G                                        |
| 618   | 850.441223  | 1698.867894        | 1698.857681        | 6.01   | 0    | (17)  | 0.022   | 1    | K.QSFDALVEGNLELHK.G                                        |
| 333   | 567.298391  | 1698.873345        | 1698.857681        | 9.22   | 0    | (12)  | 0.064   | 1    | K.QSFDALVEGNLELHK.G                                        |
| 334   | 567.298391  | 1698.873345        | 1698.857681        | 9.22   | 0    | (9)   | 0.13    | 1    | K.QSFDALVEGNLELHK.G                                        |
| 335   | 567.298391  | 1698.873345        | 1698.857681        | 9.22   | 0    | (11)  | 0.079   | 1    | K.QSFDALVEGNLELHK.G                                        |
| 336   | 567.298391  | 1698.873345        | 1698.857681        | 9.22   | 0    | (26)  | 0.0023  | 1    | K.QSFDALVEGNLELHK.G                                        |
| 619   | 567.298391  | 1698.873345        | 1698.857681        | 9.22   | 0    | (54)  | 4.1e-06 | 1    | K.QSFDALVEGNLELHK.G                                        |
| 620   | 567.298391  | 1698.873345        | 1698.857681        | 9.22   | 0    | (33)  | 0.00053 | 1    | K.QSFDALVEGNLELHK.G                                        |
| 621   | 567.298391  | 1698.873345        | 1698.857681        | 9.22   | 0    | (39)  | 0.00014 | 1    | K.QSFDALVEGNLELHK.G                                        |
| 622   | 567.298391  | 1698.873345        | 1698.857681        | 9.22   | 0    | (22)  | 0.0063  | 1    | K.QSFDALVEGNLELHK.G                                        |
| 623   | 567.298391  | 1698.873345        | 1698.857681        | 9.22   | 0    | (26)  | 0.0025  | 1    | K.QSFDALVEGNLELHK.G                                        |
| 624   | 567.298391  | 1698.873345        | 1698.857681        | 9.22   | 0    | (21)  | 0.0072  | 1    | K.QSFDALVEGNLELHK.G                                        |
| 626   | 567.298391  | 1698.873345        | 1698.857681        | 9.22   | 0    | (12)  | 0.061   | 1    | K.QSFDALVEGNLELHK.G                                        |
| 337   | 567.629924  | 1699.867944        | 1698.857681        | 595    | 0    | (19)  | 0.014   | 1    | K.QSFDALVEGNLELHK.G                                        |
| 338   | 567.629924  | 1699.867944        | 1698.857681        | 595    | 0    | (23)  | 0.0056  | 1    | K.QSFDALVEGNLELHK.G                                        |
| 339   | 567.629924  | 1699.867944        | 1698.857681        | 595    | 0    | (49)  | 1.3e-05 | 1    | K.QSFDALVEGNLELHK.G                                        |
| 345   | 573.634064  | 1717.880364        | 1717.871567        | 5.12   | 0    | (52)  | 6.1e-06 | 1    | R.YTFVLAPDELFFTR.D                                         |
| 633   | 573.634064  | 1717.880364        | 1717.871567        | 5.12   | 0    | (51)  | 7.1e-06 | 1    | R.YTFVLAPDELFFTR.D                                         |
| 634   | 573.634064  | 1717.880364        | 1717.871567        | 5.12   | 0    | (55)  | 3.1e-06 | 1    | R.YTFVLAPDELFFTR.D                                         |
| 635   | 573.634064  | 1717.880364        | 1717.871567        | 5.12   | 0    | (20)  | 0.0092  | 1    | R.YTFVLAPDELFFTR.D                                         |
| 636   | 859.948171  | 1717.881790        | 1717.871567        | 5.95   | 0    | 61    | 8e-07   | 1    | R.YTFVLAPDELFFTR.D                                         |
| 637   | 859.948171  | 1717.881790        | 1717.871567        | 5.95   | 0    | (51)  | 8.1e-06 | 1    | R.YTFVLAPDELFFTR.D                                         |
| 638   | 859.948171  | 1717.881790        | 1717.871567        | 5.95   | 0    | (45)  | 3.3e-05 | 1    | R.YTFVLAPDELFFTR.D                                         |
| 639   | 859.948171  | 1717.881790        | 1717.871567        | 5.95   | 0    | (17)  | 0.022   | 1    | R.YTFVLAPDELFFTR.D                                         |
| 640   | 859.948171  | 1717.881790        | 1717.871567        | 5.95   | 0    | (36)  | 0.00023 | 1    | R.YTFVLAPDELFFTR.D                                         |
| 641   | 859.948171  | 1717.881790        | 1717.871567        | 5.95   | 0    | (12)  | 0.061   | 1    | R.YTFVLAPDELFFTR.D                                         |
| 643   | 860.451172  | 1718.887792        | 1717.871567        | 592    | 0    | (18)  | 0.015   | 1    | R.YTFVLAPDELFFTR.D                                         |
| 684   | 621.960266  | 1862.858970        | 1862.856750        | 1.19   | 0    | (21)  | 0.0089  | 1    | -GASTQDMLTPLDAEEAAK.T + oxidation (M)                      |
| 685   | 932.437927  | 1862.861302        | 1862.856750        | 2.44   | 0    | 87    | 2.1e-09 | 1    | -GASTQDMLTPLDAEEAAK.T + oxidation (M)                      |
| 686   | 932.437927  | 1862.861302        | 1862.856750        | 2.44   | 0    | (51)  | 7.2e-06 | 1    | -GASTQDMLTPLDAEEAAK.T + oxidation (M)                      |
| 741   | 659.353699  | 1975.039269        | 1975.020355        | 9.58   | 1    | 57    | 1.9e-06 | 1    | R.TRYTFVLAPDELFFTR.D                                       |
| 742   | 659.353699  | 1975.039269        | 1975.020355        | 9.58   | 1    | (21)  | 0.0073  | 1    | R.TRYTFVLAPDELFFTR.D                                       |
| 459   | 659.687622  | 1976.041038        | 1975.020355        | 517    | 1    | (23)  | 0.005   | 1    | R.TRYTFVLAPDELFFTR.D                                       |
| 504   | 695.376800  | 2083.108572        | 2083.094971        | 6.53   | 0    | (37)  | 0.00021 | 1    | R.GLQNVVDPLPVSEAEFLTR.Y                                    |
| 749   | 695.376800  | 2083.108572        | 2083.094971        | 6.53   | 0    | (62)  | 5.8e-07 | 1    | R.GLQNVVDPLPVSEAEFLTR.Y                                    |
| 750   | 695.376800  | 2083.108572        | 2083.094971        | 6.53   | 0    | (87)  | 2.2e-09 | 1    | R.GLQNVVDPLPVSEAEFLTR.Y                                    |
| 751   | 695.376800  | 2083.108572        | 2083.094971        | 6.53   | 0    | 104   | 4.4e-11 | 1    | R.GLQNVVDPLPVSEAEFLTR.Y                                    |
| 752   | 695.376800  | 2083.108572        | 2083.094971        | 6.53   | 0    | (60)  | 9.8e-07 | 1    | R.GLQNVVDPLPVSEAEFLTR.Y                                    |
| 753   | 695.376800  | 2083.108572        | 2083.094971        | 6.53   | 0    | (40)  | 0.0001  | 1    | R.GLQNVVDPLPVSEAEFLTR.Y                                    |
| 754   | 1042.563375 | 2083.112198        | 2083.094971        | 8.27   | 0    | (94)  | 3.9e-10 | 1    | R.GLQNVVDPLPVSEAEFLTR.Y                                    |
| 755   | 1042.563375 | 2083.112198        | 2083.094971        | 8.27   | 0    | (68)  | 1.7e-07 | 1    | R.GLQNVVDPLPVSEAEFLTR.Y                                    |
| 756   | 1042.563375 | 2083.112198        | 2083.094971        | 8.27   | 0    | (70)  | 9.7e-08 | 1    | R.GLQNVVDPLPVSEAEFLTR.Y                                    |
| 757   | 1042.563375 | 2083.112198        | 2083.094971        | 8.27   | 0    | (90)  | 1e-09   | 1    | R.GLQNVVDPLPVSEAEFLTR.Y                                    |
| 758   | 1042.563375 | 2083.112198        | 2083.094971        | 8.27   | 0    | (76)  | 2.6e-08 | 1    | R.GLQNVVDPLPVSEAEFLTR.Y                                    |
| 759   | 1042.563375 | 2083.112198        | 2083.094971        | 8.27   | 0    | (27)  | 0.0019  | 1    | R.GLQNVVDPLPVSEAEFLTR.Y                                    |
| 505   | 695.709351  | 2084.106225        | 2083.094971        | 485    | 0    | (39)  | 0.00011 | 1    | R.GLQNVVDPLPVSEAEFLTR.Y                                    |
| 760   | 695.709351  | 2084.106225        | 2083.094971        | 485    | 0    | (31)  | 0.00074 | 1    | R.GLQNVVDPLPVSEAEFLTR.Y                                    |
| 761   | 1043.061279 | 2084.108006        | 2083.094971        | 486    | 0    | (44)  | 3.8e-05 | 1    | R.GLQNVVDPLPVSEAEFLTR.Y                                    |



Table S3 Continued

| Query | Observed    | $M_r$ (expt) | $M_r$ (calc) | p.p.m. | Miss | Score | Expect  | Rank | Peptide                                     |
|-------|-------------|--------------|--------------|--------|------|-------|---------|------|---------------------------------------------|
| 762   | 1043.061279 | 2084.108006  | 2083.094971  | 486    | 0    | (24)  | 0.0036  | 1    | R.GLQNVDPPLPVSEAEFLTR.Y                     |
| 801   | 1141.108002 | 2280.201452  | 2280.188904  | 5.50   | 0    | 127   | 1.8e-13 | 1    | K.VIEAATLDLLTAFLDEQYQK.Q                    |
| 802   | 1141.108002 | 2280.201452  | 2280.188904  | 5.50   | 0    | (104) | 3.9e-11 | 1    | K.VIEAATLDLLTAFLDEQYQK.Q                    |
| 803   | 1141.108002 | 2280.201452  | 2280.188904  | 5.50   | 0    | (105) | 2.9e-11 | 1    | K.VIEAATLDLLTAFLDEQYQK.Q                    |
| 804   | 1141.108002 | 2280.201452  | 2280.188904  | 5.50   | 0    | (85)  | 3.4e-09 | 1    | K.VIEAATLDLLTAFLDEQYQK.Q                    |
| 805   | 761.075882  | 2280.205818  | 2280.188904  | 7.42   | 0    | (88)  | 1.6e-09 | 1    | K.VIEAATLDLLTAFLDEQYQK.Q                    |
| 806   | 761.075882  | 2280.205818  | 2280.188904  | 7.42   | 0    | (89)  | 1.2e-09 | 1    | K.VIEAATLDLLTAFLDEQYQK.Q                    |
| 807   | 761.075882  | 2280.205818  | 2280.188904  | 7.42   | 0    | (76)  | 2.5e-08 | 1    | K.VIEAATLDLLTAFLDEQYQK.Q                    |
| 808   | 761.075882  | 2280.205818  | 2280.188904  | 7.42   | 0    | (77)  | 1.8e-08 | 1    | K.VIEAATLDLLTAFLDEQYQK.Q                    |
| 558   | 761.411194  | 2281.211754  | 2280.188904  | 449    | 0    | (49)  | 1.2e-05 | 1    | K.VIEAATLDLLTAFLDEQYQK.Q                    |
| 559   | 761.411194  | 2281.211754  | 2280.188904  | 449    | 0    | (42)  | 6.6e-05 | 1    | K.VIEAATLDLLTAFLDEQYQK.Q                    |
| 828   | 805.104858  | 2412.292746  | 2412.272934  | 8.21   | 1    | 23    | 0.0047  | 1    | R.YTFVLAPDELFFTRDGLPIAK.T                   |
| 829   | 805.104858  | 2412.292746  | 2412.272934  | 8.21   | 1    | (23)  | 0.005   | 1    | R.YTFVLAPDELFFTRDGLPIAK.T                   |
| 830   | 609.037720  | 2432.121776  | 2432.103302  | 7.60   | 0    | (14)  | 0.043   | 1    | R.DSFQIHYDINDNHTPFQDNK.S                    |
| 831   | 811.714905  | 2432.122887  | 2432.103302  | 8.05   | 0    | 37    | 0.0002  | 1    | R.DSFQIHYDINDNHTPFQDNK.S                    |
| 832   | 1217.069397 | 2432.124242  | 2432.103302  | 8.61   | 0    | (9)   | 0.13    | 1    | R.DSFQIHYDINDNHTPFQDNK.S                    |
| 906   | 911.717468  | 3642.840768  | 3642.818039  | 6.24   | 0    | 32    | 0.0006  | 1    | K.SSIKPEHFHLMYLLLEQHSPLYFIDAE TELR.D        |
| 907   | 729.577667  | 3642.851955  | 3642.818039  | 9.31   | 0    | (15)  | 0.033   | 1    | K.SSIKPEHFHLMYLLLEQHSPLYFIDAE TELR.D        |
| 908   | 729.577667  | 3642.851955  | 3642.818039  | 9.31   | 0    | (15)  | 0.031   | 1    | K.SSIKPEHFHLMYLLLEQHSPLYFIDAE TELR.D        |
| 910   | 738.368835  | 3686.807795  | 3684.828598  | 537    | 0    | (2)   | 0.7     | 1    | K.SSIKPEHFHLMYLLLEQHSPLYFIDAE TELR.D acetyl |

Received 30 July 2012/1 October 2012; accepted 25 October 2012  
 Published as BJ Immediate Publication 25 October 2012, doi:10.1042/BJ20121209
